# Supplementary material
Source: publisher figshare collection journal article supplement (https://gsajournals.figshare.com/articles/dataset/_/14134724)
Supplement: Supplementary file 2 [file 1]

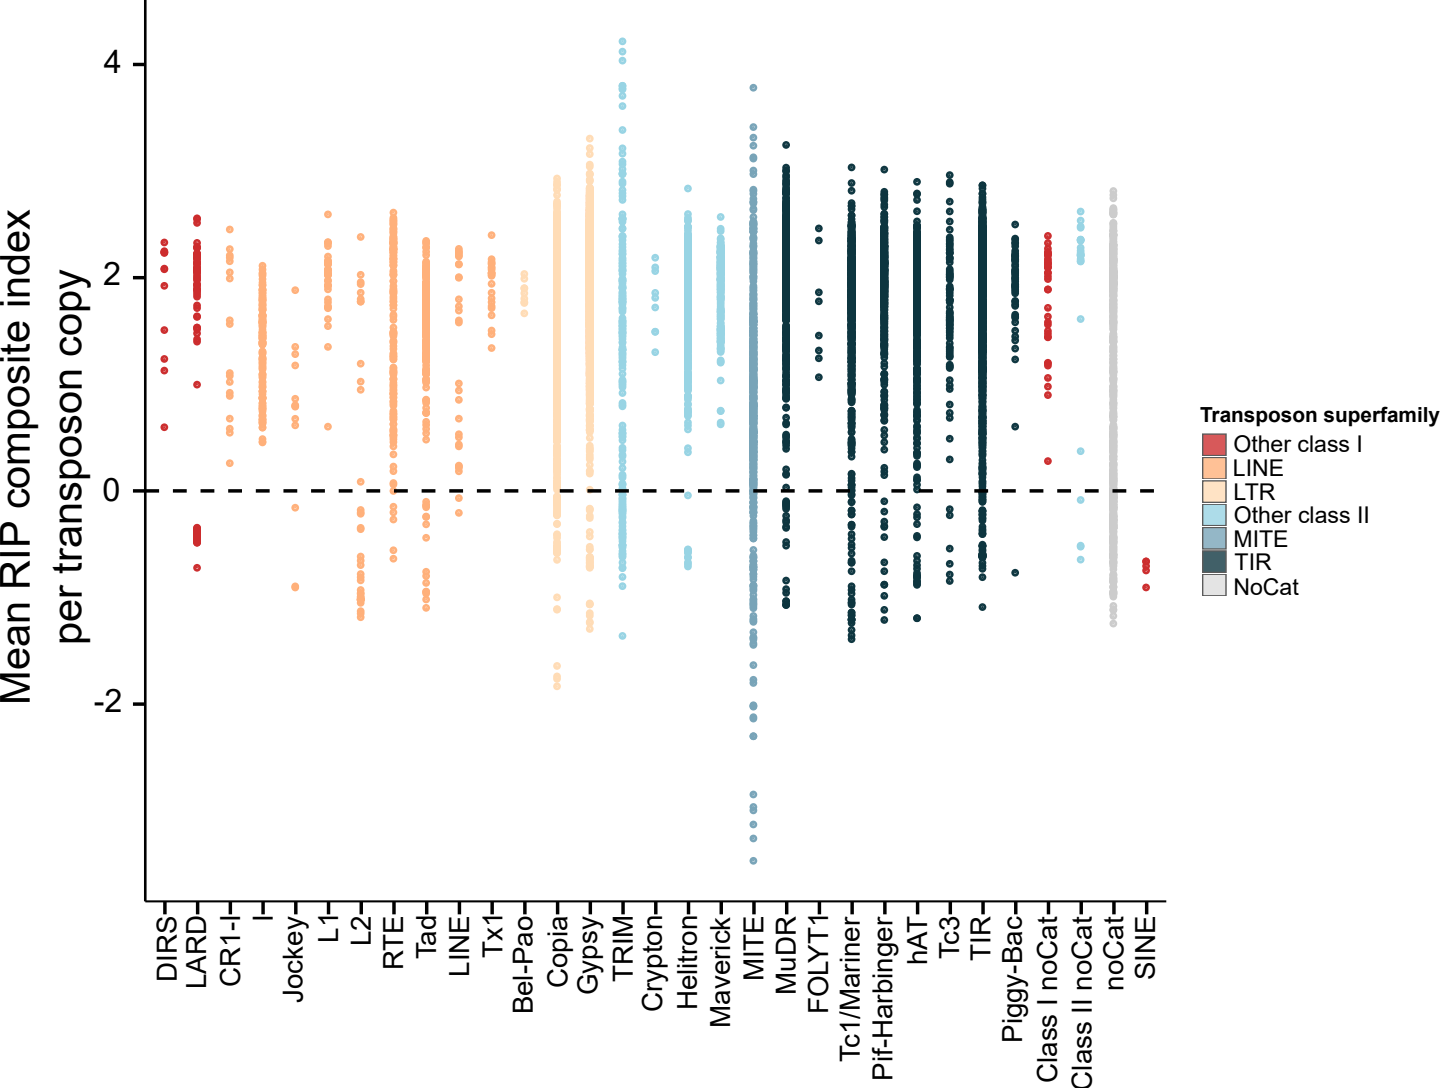

**Figure S6: Repeat-induced point mutation (RIP) composite index per TE copy of *Zymoseptoria* species.** Mean RIP composite index (CRI) frequencies of TEs estimated using a 50bp sliding windows approach as follows:  $CRI = (TpA / ApT) - (CpA + TpG / ApC + GpT)$  for each TE copy per order from Class I and Class II. Regions of more than 4000 bp that are consecutively affected by RIP are considered to be LRARs (large RIP affected genomic regions).
