# Supplementary material
Source: publisher figshare collection journal article supplement (https://gsajournals.figshare.com/articles/dataset/_/14134724)
Supplement: Supplementary file 4 [file 1]

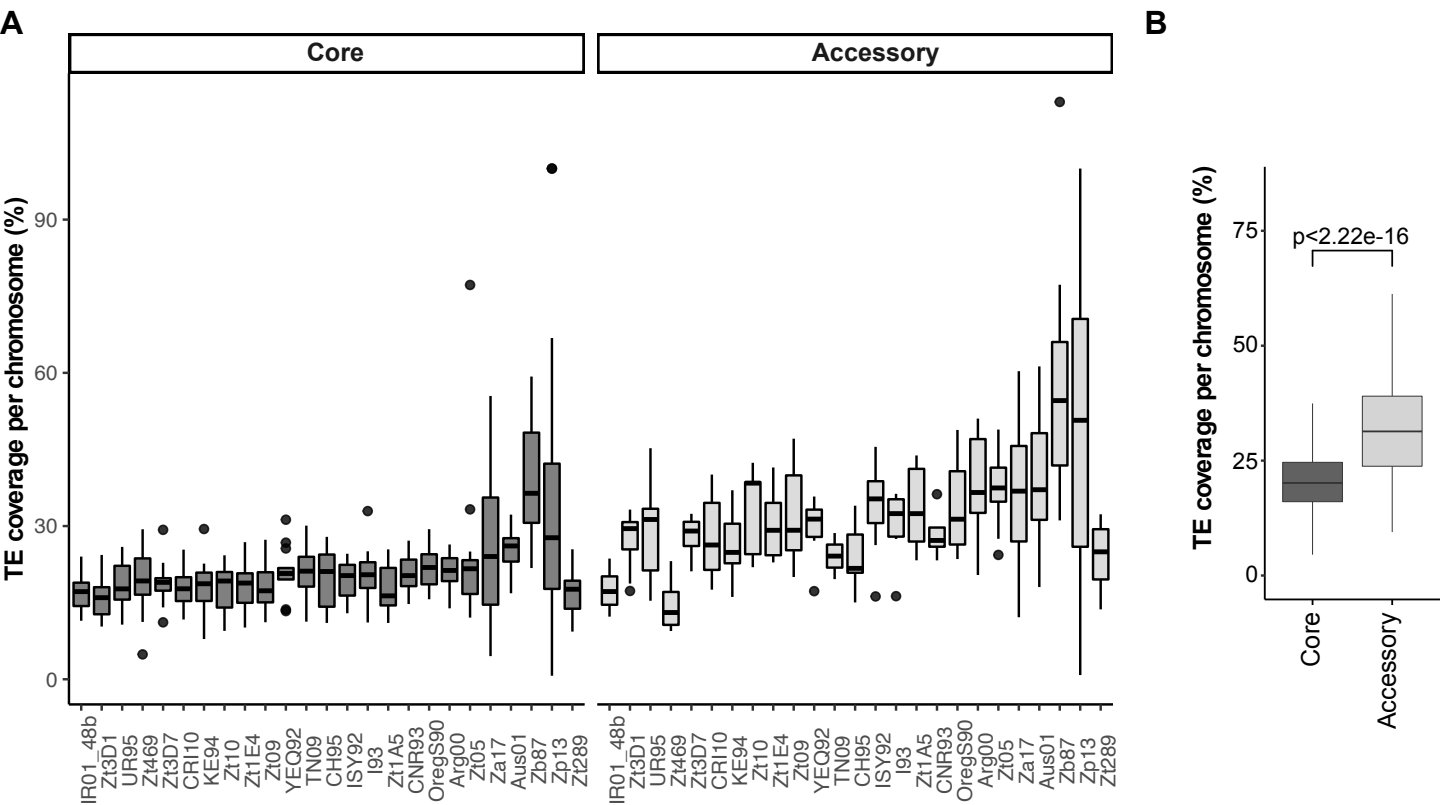

**Figure S3: TE content per genome compartments.** TE percentage on the core (dark grey) and accessory (light grey) chromosomes of A) for each *Zymoseptoria* spp. genomes. B) overall the twenty-six genomes. The boxplots represent the distribution of TE coverage percentage per chromosome or contig and statical comparison between TE coverage in core versus accessory genome, using Kruskal-Wallis test.
