# Supplementary material
Source: publisher figshare collection journal article supplement (https://gsajournals.figshare.com/articles/dataset/_/14134724)
Supplement: Supplementary file 5 [file 1]

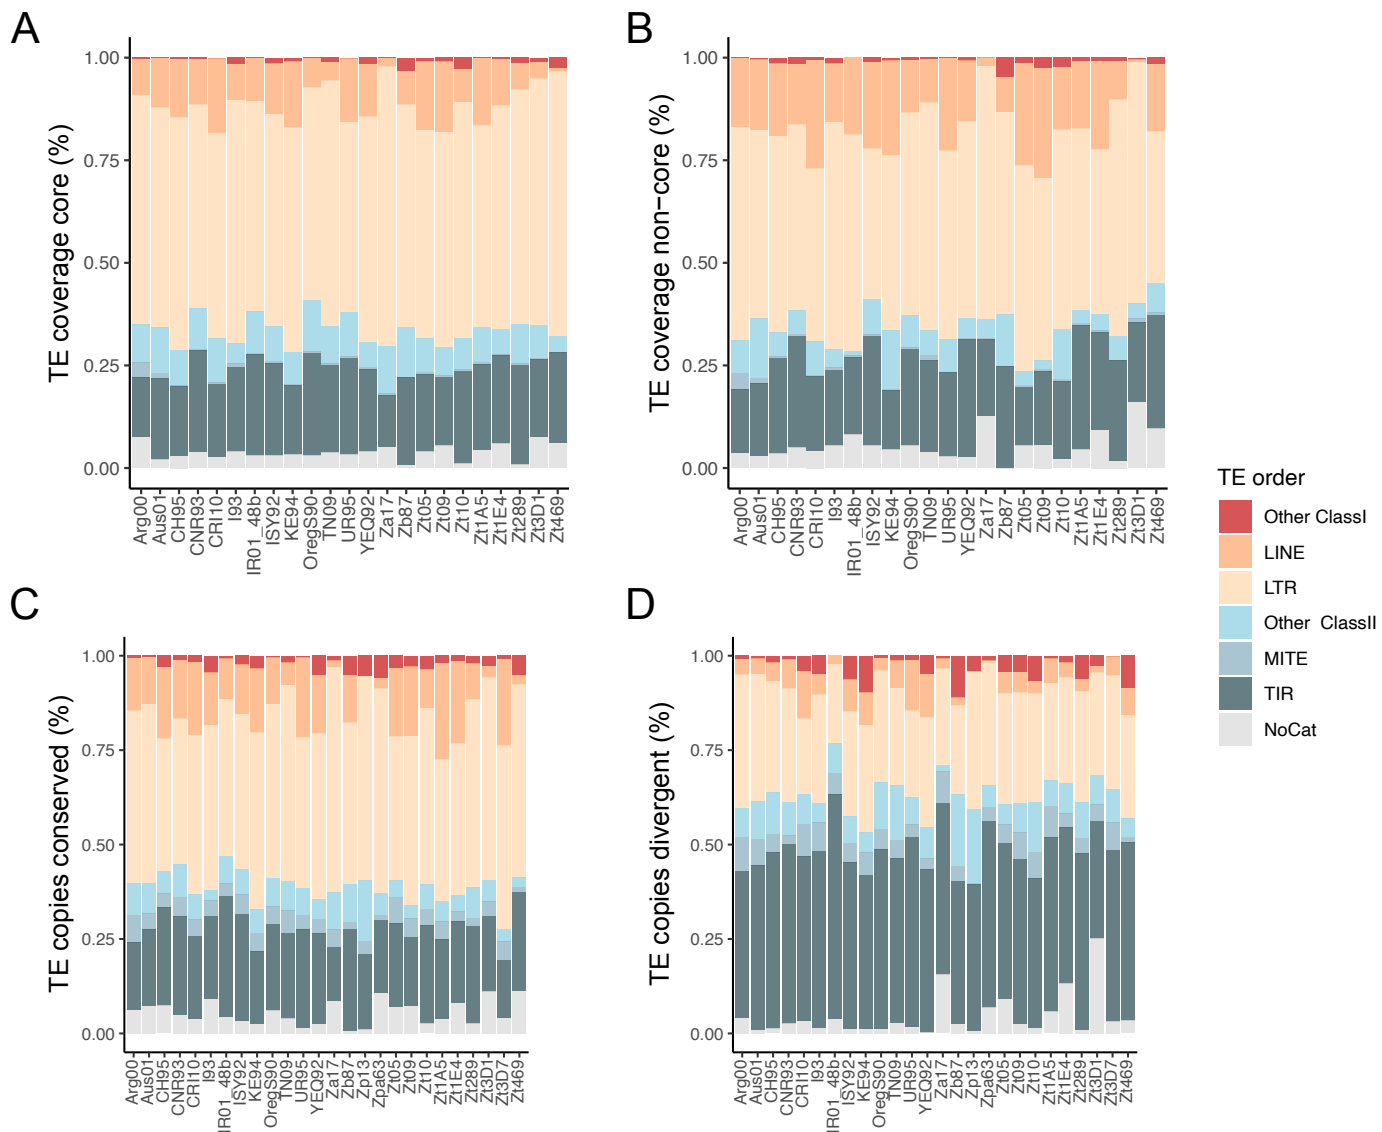

**Figure S2: Relative abundance of TE divergent and conserved copies per genome.** A) TE coverage percentage on core, B) TE coverage percentage on accessory, C) percentage of conserved TE copies, D) percentage of divergent TE copies. The divergent copies have less than 85% of sequence identity to their cognate consensus while conserved copies have more than 95% of sequence identity to the consensus. Retrotransposons are represented in warm colors (LTR in light orange, LINE in orange and other retrotransposons orders in red) and DNA transposons are represented in cold colors (TIR in dark blue, MITE in blue and other DNA transposons in light blue). Uncategorized TEs are represented in grey.
