# Supplementary material
Source: publisher figshare collection journal article supplement (https://gsajournals.figshare.com/articles/dataset/_/14134724)
Supplement: Supplementary file 6 [file 1]

A

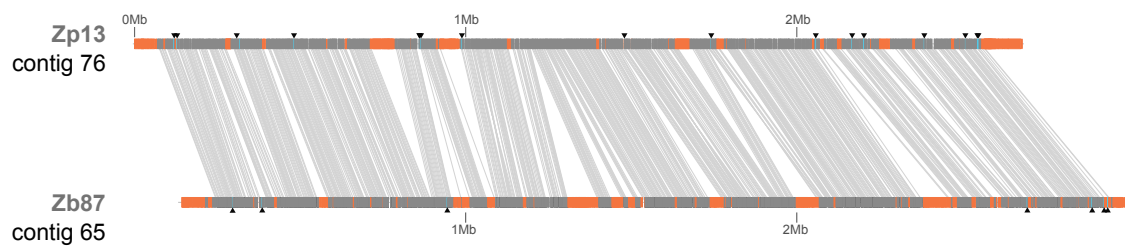

B

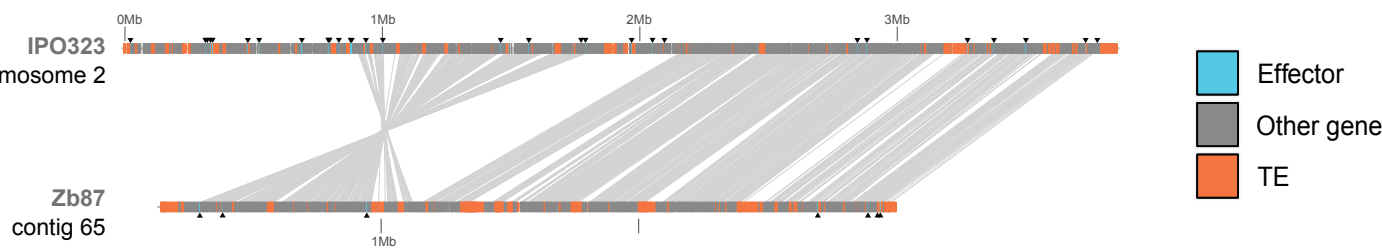

C

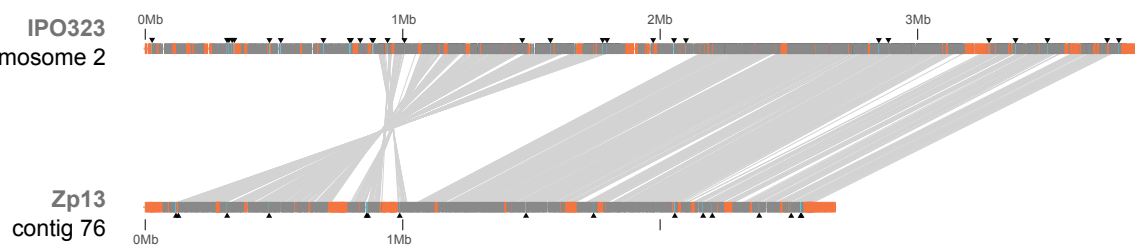

**Figure S5: Chromosomal inversion identified in *Z. tritici* IPO323 compared to *Z. brevis* Zb87 and *Z. pseudotritici* Zp13.** TEs are represented in orange, genes in grey and effectors genes in blue. Links indicate orthologous genes. Arrows represent effector genes loci.
